# Supplementary material for: A colorimetric sensor for the sequential detection of Cu2+and CN−in fully aqueous media: practical performance of Cu2+
Source: Royal Society of Chemistry journal article supplement (doi:10.1039/c5dt00772k), 2015-01-01
Supplement: c5dt00772k1.pdf [file c5dt00772k1.pdf]

## Supporting Information

### **A colorimetric sensor for the sequential detection of Cu<sup>2+</sup> and CN<sup>-</sup> in fully aqueous media: practical performance of Cu<sup>2+</sup>**

Ga Rim You, Gyeong Jin Park, Jae Jun Lee, Cheal Kim\*

*Department of Fine Chemistry and Department of Interdisciplinary Bio IT Materials, Seoul National University of Science and Technology, Seoul 139-743, Korea. Fax: +82-2-973-9149; Tel: +82-2-970-6693; E-mail: [chealkim@seoultech.ac.kr](mailto:chealkim@seoultech.ac.kr)*

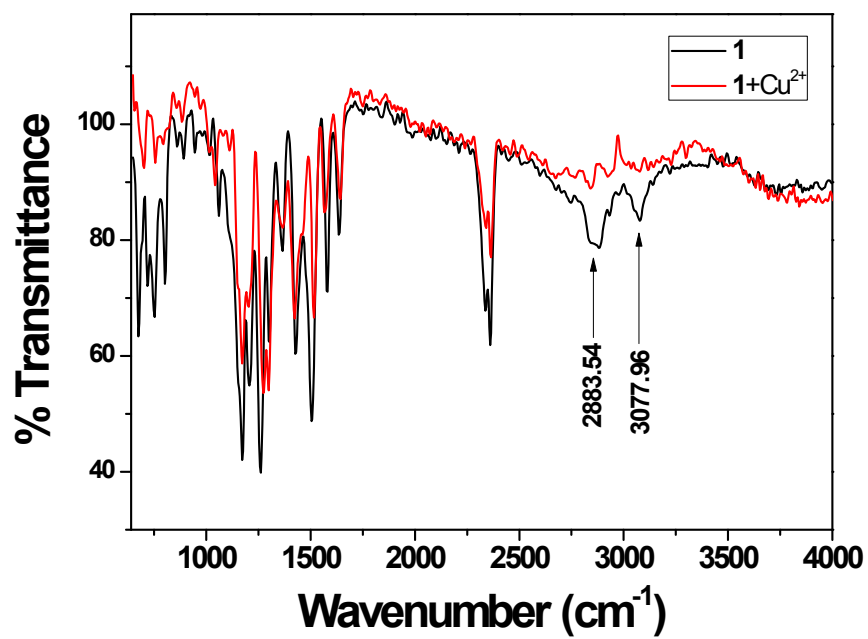

**Fig. S1** FT-IR spectra of **1** and Cu<sup>2+</sup>-2**1** complex.

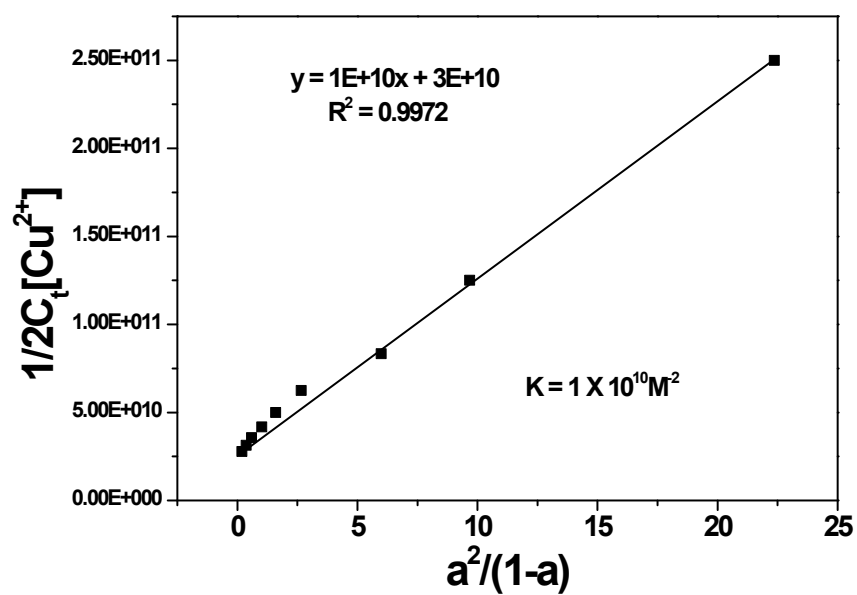

**Fig. S2** Li's equation plot (absorbance at 525 nm) of **1**, assuming 2:1 stoichiometry for association between **1** and  $Cu^{2+}$ .

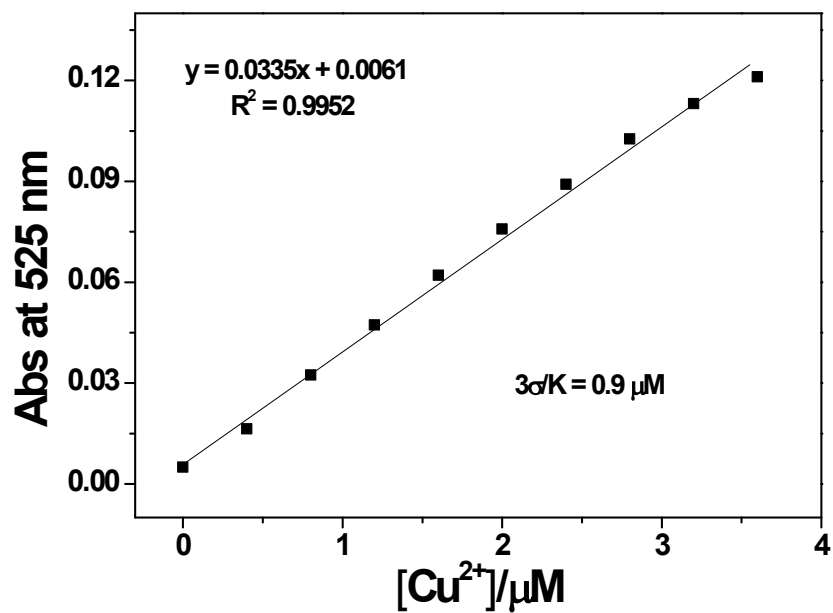

**Fig. S3** Determination of the detection limit based on change in the ratio (absorbance at 525 nm) of **1** (10  $\mu M$ ) with  $Cu^{2+}$ .

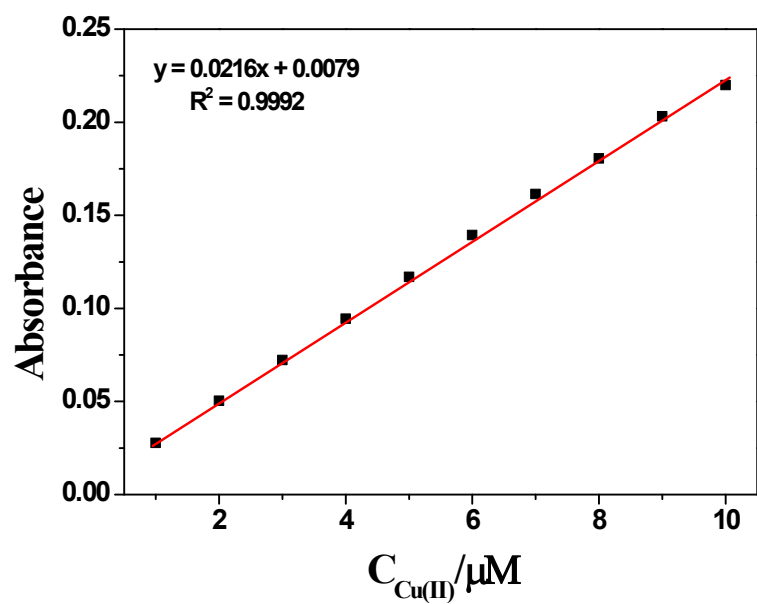

**Fig. S4** Absorption intensity (at 525 nm) of **1** as a function of  $\text{Cu}^{2+}$  concentration.  $[\mathbf{1}] = 30 \mu\text{mol/L}$  and  $[\text{Cu}^{2+}] = 1.00\text{-}10.00 \mu\text{mol/L}$  in 10 mM bis-tris buffer-DMSO solution (8:2, pH 7.0).

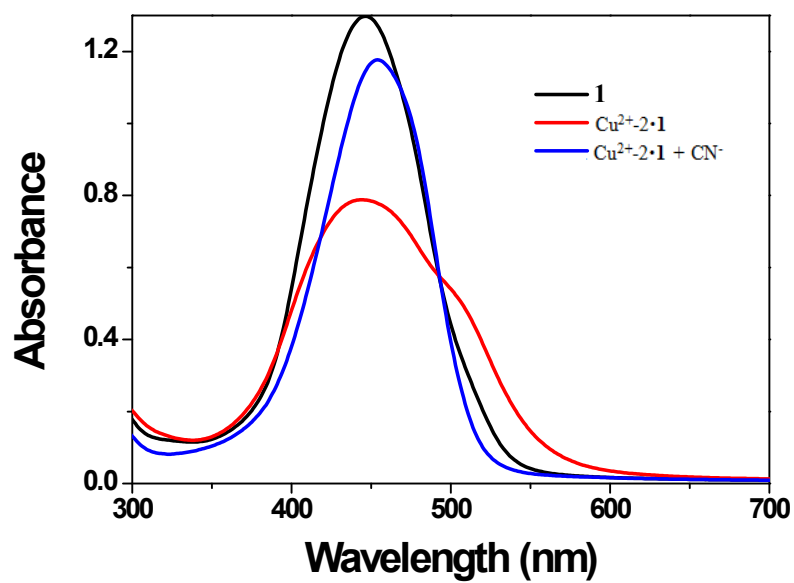

**Fig. S5** UV-vis spectra of **1** (30  $\mu\text{M}$ ),  $\text{Cu}^{2+}\text{-}2\cdot\mathbf{1}$  ( $\text{Cu}^{2+} = 15 \mu\text{M}$ ), and  $\text{Cu}^{2+}\text{-}2\cdot\mathbf{1} + \text{CN}^-$  (200 equiv) in bis-tris buffer solution.

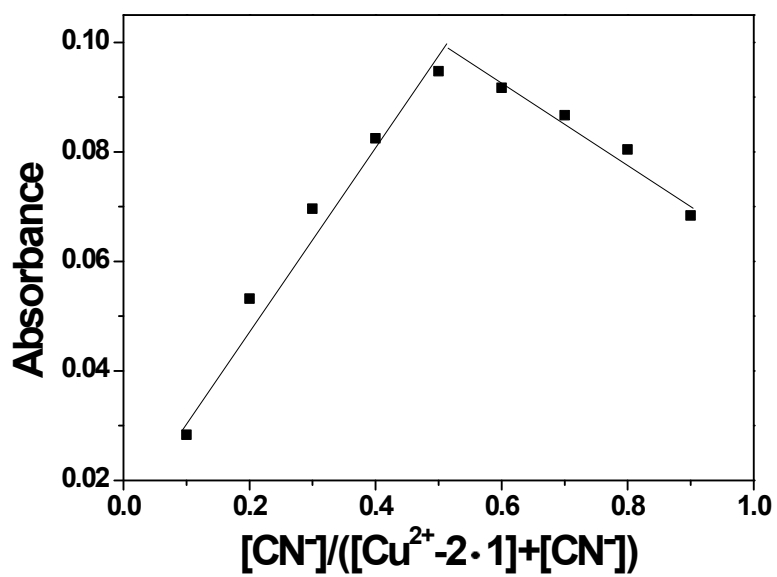

**Fig. S6** Job plot of Cu<sup>2+</sup>-2α1 complex and CN<sup>-</sup>, where the intensity at 454 nm was plotted against the mole fraction of CN<sup>-</sup>. The total concentrations of CN<sup>-</sup> with Cu<sup>2+</sup>-2α1 complex were 100 μM.

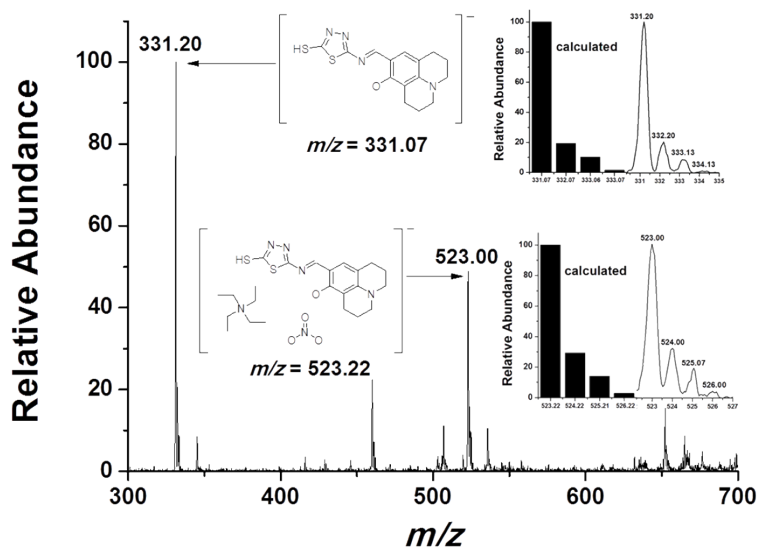

**Fig. S7** Negative-ion electrospray ionization mass spectrum of  $\text{Cu}^{2+}$ -**2C31** (0.1 mM) upon addition of  $\text{CN}^-$  (1 equiv).



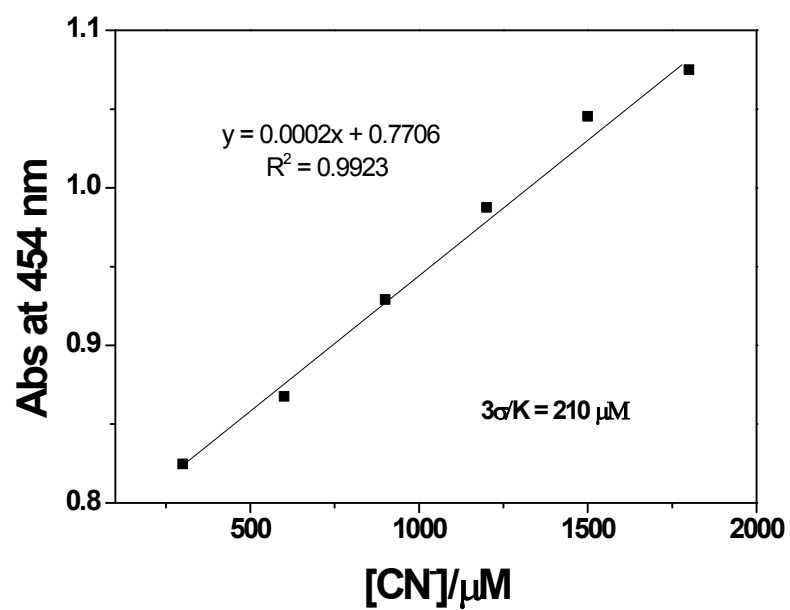

**Fig. S8** Determination of the detection limit based on change in the ratio (absorbance at 454 nm) of  $\text{Cu}^{2+}$ - $2\alpha\text{1}$  ( $15 \mu\text{M}$ ) with  $\text{CN}^-$ .

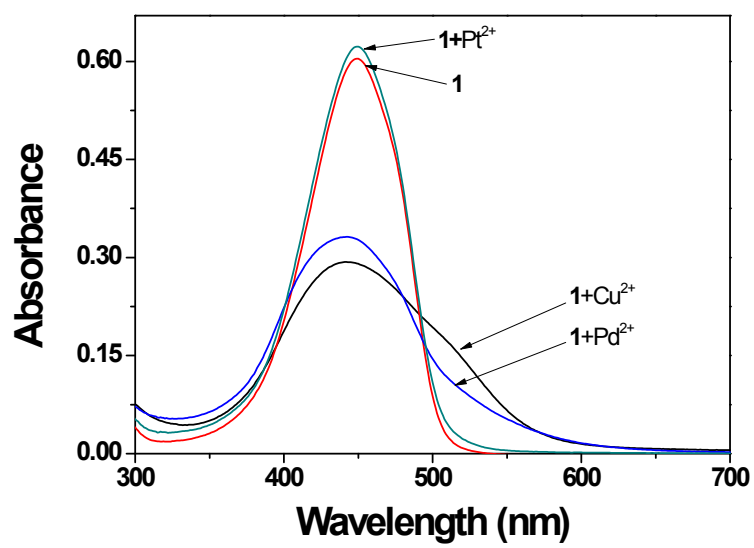

**Fig. S9** UV-vis spectra of **1** (10  $\mu$ M), **1**+Cu<sup>2+</sup>, **1**+Pd<sup>2+</sup> and **1**+Pt<sup>2+</sup> (0.5 equiv) in bis-tris buffer solution.
